# Supplementary material for: Astaxanthin Prevents Diet-Induced NASH Progression by Shaping Intrahepatic Immunity
Source: MDPI journal article supplement (doi:10.3390/ijms222011037), 2021-10-13
Supplement: s1 [file s1]

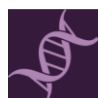

Supplementary Information

# Astaxanthin Prevents Diet-Induced NASH Progression by Shaping Intrahepatic Immunity

Ming Yang <sup>1</sup>, Eric T. Kimchi <sup>1,2</sup>, Kevin F. Staveley-O'Carroll <sup>1,2,\*</sup>, and Guangfu Li <sup>1,2,3,\*</sup>

<sup>1</sup> Department of Surgery, University of Missouri, Columbia, MO 65212, USA; yangmin@health.missouri.edu

<sup>2</sup> Harry S. Truman Memorial VA Hospital, Columbia, MO 65201, USA; kimchie@health.missouri.edu

<sup>3</sup> Department of Molecular Microbiology and Immunology, University of Missouri, Columbia, MO 65212, USA;

\* Correspondence: K.S., ocarrollk@health.missouri.edu; G.L., liguan@health.missouri.edu.

## Supplementary materials

**Table S1** Primers for real-time PCR.

| Genes           | Forward (5'-3')       | Reverse (5'-3')        |
|-----------------|-----------------------|------------------------|
| $\alpha$ -SMA   | GGCTCTGGGCTCTGTAAGG   | CTCTTGCTCTGGGCTTCATC   |
| Col1 $\alpha$ 1 | CCAAGGGTAACAGCGGTGAA  | CCTCGTTTTCTTCTTCTCCG   |
| Col4 $\alpha$ 1 | TTAAAGGACTCCAGGGACCAC | CCCACTGAGCCTGTCACAC    |
| IL-1 $\beta$    | TCTGAAGCAGCTATGGCAAC  | ATGAGTTGGGGACTCTCTGG   |
| TGF- $\beta$ 1  | GGTTCATGTCATGGATGGTGC | TGACGTCCTGGAGTTGTACGG  |
| TNF- $\alpha$   | ACGGCATGGATCTCAAAGAC  | GTGGGTGAGGAGCACGTAGT   |
| CCL2            | CCCCAAGAAGGAATGGGTCC  | GTGCTGAAGACCTTAGGGCA   |
| CCL5            | TGCCAACCCAGAGAAGAAGTG | TAGGGGATTACTGAGTGGCATC |

**Table S2** Antibodies for flow cytometry and immunohistochemistry.

| REAGENT or RESOURCE                                  | SOURCE            | IDENTIFIER        |
|------------------------------------------------------|-------------------|-------------------|
| APC anti-mouse/human CD45R/B220 Antibody (FACS)      | BioLegend         | CAT# 103212       |
| FITC anti-mouse CD3 Antibody (FACS)                  | BioLegend         | CAT# 100204       |
| PE anti-mouse CD4 Antibody (FACS)                    | BioLegend         | CAT# 116006       |
| BV605 anti-mouse CD8a Antibody (FACS)                | BioLegend         | CAT# 100744       |
| BV605 anti-mouse/human CD11b Antibody (FACS)         | BioLegend         | CAT# 101257       |
| FITC anti-mouse CD11c Antibody (FACS)                | BioLegend         | CAT# 117306       |
| BV421 anti-mouse CD45 Antibody (FACS)                | BioLegend         | CAT# 103133       |
| FITC anti-mouse CD49b (pan-NK cells) Antibody (FACS) | BioLegend         | CAT# 108906       |
| APC anti-mouse F4/80 Antibody                        | BioLegend         | CAT# 123116       |
| FITC anti-mouse NK-1.1 Antibody                      | BioLegend         | CAT# 108706       |
| 7-AAD Viability Staining Solution                    | BioLegend         | CAT# 420404       |
| Alexa Fluor® 647 Mouse anti-GFAP                     | BD Biosciences    | CAT# 560298       |
| Fixable Viability Dye eFluor™ 780                    | Invitrogen        | CAT# 65-0865-14   |
| Collagen I alpha 1 Antibody [FITC]                   | Novus Biologicals | CAT# NBP1-77458F  |
| alpha-Smooth Muscle Actin Antibody (1A4/asm-1) [PE]  | Novus Biologicals | CAT# NBP2-34522PE |
| Anti-alpha smooth muscle Actin antibody [E184]       | Abcam             | CAT# ab32575      |

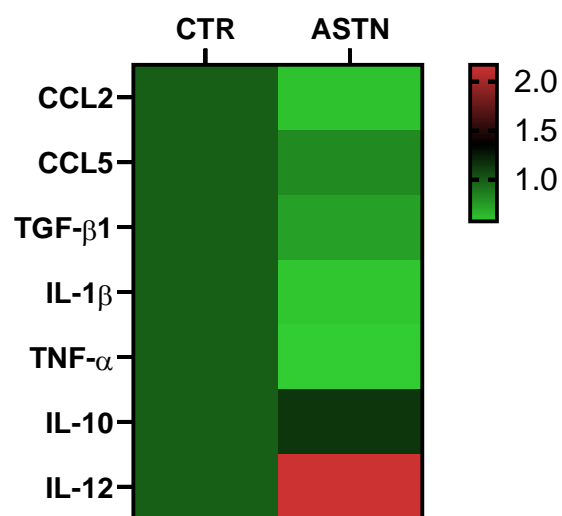

**Figure S1.** Astaxanthin treatment inhibits LPS-induced activation of RAW264.7 cells. RAW264.7 cells were stimulated with 100 ng/ml of lipopolysaccharide (LPS) and co-treated with ASTN or vehicle control (CTR). qPCR measured ASTN treatment decreased the mRNA expression of pro-inflammatory cytokines CCL2, CCL5, TGF-β1, IL-1β, and TNF-α, while increased the mRNA expression of anti-inflammatory cytokines IL-10 and IL-12 in RAW264.7 cells compared to the control group.  $n=3$ , error bars represent the mean  $\pm$  SD. Statistical analysis of data was performed by Student's *t*-test using GraphPad Prism 8 software.  $**p < 0.01$ ,  $*p < 0.05$ .
